# Supplementary material for: Priorities for Research into the Impact of Canine Surgical Sterilisation Programmes for Free-Roaming Dogs: An International Priority Setting Partnership
Source: Animals (Basel). 2021 Jul 30;11(8):2250. doi: 10.3390/ani11082250 (PMC8388514; doi:10.3390/ani11082250)
Supplement: Supplementary file 1 [file animals-11-02250-s001.zip]

Archive with 8 entries (8 files):
- File S1 JLA Sterilisation PSP Protocol.pdf
- File S2 Initial Scoping Survey.pdf
- File S3 Full demographic data.pdf
- File S4 Excluded questions submitted to the initial scoping survey.pdf
- File S5 Questions for final prioritisation.pdf
- Table S1 Reprise Reporting Guidelines.pdf
- Table S2 Evidence search.pdf
- Table S3 Questions for interim prioritisation.pdf
