# Supplementary material for: Priorities for Research into the Impact of Canine Surgical Sterilisation Programmes for Free-Roaming Dogs: An International Priority Setting Partnership
Source: Animals (Basel). 2021 Jul 30;11(8):2250. doi: 10.3390/ani11082250 (PMC8388514; doi:10.3390/ani11082250)
Supplement: Supplementary file 1 [file animals-11-02250-s001.zip › File S3 Full demographic data.pdf]

## File S3 Demographic data of all survey respondents

### 1. Initial survey

#### 1.1 Countries of residence

- Countries/regions of residence (as determined by the United Nations geoscheme which divides countries of the world into regional and sub-regional groups):

| Region   | Sub-region                      | Countries    | No. |
|----------|---------------------------------|--------------|-----|
| Africa   |                                 | Ethiopia     | 1   |
|          |                                 | Ghana        | 1   |
|          |                                 | Kenya        | 1   |
|          |                                 | Liberia      | 1   |
|          |                                 | Malawi       | 2   |
|          |                                 | Namibia      | 2   |
|          |                                 | Nigeria      | 2   |
|          |                                 | South Africa | 1   |
|          |                                 | South Sudan  | 1   |
|          |                                 | Swaziland    | 1   |
|          |                                 | Tanzania     | 2   |
|          |                                 | Uganda       | 1   |
|          |                                 | TOTAL - 12   | 16  |
| Americas | North America                   | Canada       | 2   |
|          |                                 | USA          | 13  |
|          |                                 | TOTAL: 2     | 15  |
|          | Latin America and the Caribbean | Bahamas      | 1   |
|          |                                 | Belize       | 1   |
|          |                                 | Chile        | 2   |
|          |                                 | Costa Rica   | 2   |
|          |                                 | Ecuador      | 1   |
|          |                                 | El Salvador  | 1   |
|          |                                 | Grenada      | 1   |
|          |                                 | Guatemala    | 1   |
|          |                                 | Haiti        | 1   |
|          |                                 | Mexico       | 3   |
|          |                                 | Nicaragua    | 1   |
|          |                                 | Panama       | 1   |
|          |                                 | TOTAL: 12    | 16  |
| Asia     | South Asia                      | Afghanistan  | 1   |
|          |                                 | Bangladesh   | 1   |
|          |                                 | India        | 12  |
|          |                                 | Nepal        | 2   |
|          |                                 | Pakistan     | 4   |
|          | South Eastern Asia              | Indonesia    | 1   |
|          |                                 | Malaysia     | 4   |
|          |                                 | Philippines  | 1   |
|          |                                 | Thailand     | 2   |
|          |                                 | Vietnam      | 1   |

|         |              |                                                                                                                       |                                            |
|---------|--------------|-----------------------------------------------------------------------------------------------------------------------|--------------------------------------------|
|         | Western Asia | Oman<br>Iraq<br><br>TOTAL: 12                                                                                         | 1<br>1<br><br>31                           |
| Oceania |              | Australia<br>New Zealand<br><br>TOTAL: 2                                                                              | 9<br>1<br><br>10                           |
| Europe  |              | Bulgaria<br>Bosnia and Herzegovina<br>Denmark<br>Ireland<br>Netherlands<br>Portugal<br>United Kingdom<br><br>TOTAL: 7 | 1<br>1<br>1<br>1<br>1<br>1<br>16<br><br>22 |

## 1.2 Countries worked in

| Region   | Sub-region                          | Country       | Number |
|----------|-------------------------------------|---------------|--------|
| Africa   | Northern Africa:                    | Egypt         | 2      |
|          |                                     | Morocco       | 2      |
|          |                                     | Tunisia       | 1      |
|          | Sub-Saharan Africa:                 | Botswana      | 1      |
|          |                                     | Chad          | 1      |
|          |                                     | Ethiopia      | 1      |
|          |                                     | Gambia        | 1      |
|          |                                     | Ghana         | 3      |
|          |                                     | Kenya         | 5      |
|          |                                     | Liberia       | 1      |
|          |                                     | Malawi        | 6      |
|          |                                     | Mauritius     | 2      |
|          |                                     | Mozambique    | 1      |
|          |                                     | Namibia       | 2      |
|          |                                     | Nigeria       | 3      |
|          |                                     | Rwanda        | 1      |
|          |                                     | Sierra Leone  | 1      |
|          |                                     | South Africa  | 3      |
|          |                                     | South Sudan   | 1      |
|          |                                     | Swaziland     | 1      |
|          |                                     | Tanzania      | 7      |
|          |                                     | Uganda        | 2      |
|          |                                     | TOTAL: 22     | 48     |
| Americas | North America:                      | Canada<br>USA | 6<br>6 |
|          | Latin America:<br>and the Caribbean | Argentina     | 2      |
|          |                                     | Bahamas       | 1      |
|          |                                     | Belize        | 5      |
|          |                                     | Brazil        | 2      |
|          |                                     | Bolivia       | 1      |

|         |                                                                                    |                                                                                                                                                                                                                                                                                                                                 |                                                                                                                                                    |
|---------|------------------------------------------------------------------------------------|---------------------------------------------------------------------------------------------------------------------------------------------------------------------------------------------------------------------------------------------------------------------------------------------------------------------------------|----------------------------------------------------------------------------------------------------------------------------------------------------|
|         |                                                                                    | Chile<br>Colombia<br>Costa Rica<br>Dominican Republic<br>Ecuador<br>El Salvador<br>Guatemala<br>Guyana<br>Haiti<br>Honduras<br>Jamaica<br>Mexico<br>Nicaragua<br>Panama<br>Paraguay<br>Peru<br>St Kitts and Nevis<br>St Lucia<br>Suriname<br>Uruguay<br><br>TOTAL:27                                                            | 2<br>5<br>4<br>8<br>11<br>2<br>11<br>1<br>2<br>7<br>2<br>10<br>11<br>5<br>3<br>9<br>1<br>1<br>1<br>2<br><br>109                                    |
| Asia    | Eastern Asia<br><br>South Eastern Asia:<br><br>Southern Asia:<br><br>Western Asia: | China<br>South Korea<br><br>Cambodia<br>Indonesia<br>Laos<br>Malaysia<br>Philippines<br>Thailand<br>Vietnam<br><br>Afghanistan<br>Bangladesh<br>Bhutan<br>India<br>Iran (Islamic republic of)<br>Nepal<br>Pakistan<br>Sri Lanka<br><br>Armenia<br>Iraq<br>Jordan<br>Oman<br>Qatar<br>Syria<br>Turkey<br><br>TOTAL: 24 countries | 1<br>1<br><br>8<br>5<br>4<br>5<br>2<br>17<br>2<br><br>1<br>2<br>1<br>35<br>1<br><br>18<br>4<br>9<br><br>1<br>1<br>1<br>1<br>1<br>1<br>3<br><br>125 |
| Oceania | Australasia:<br><br>Melanesia:                                                     | Australia<br><br>Solomon Islands                                                                                                                                                                                                                                                                                                | 5<br><br>1                                                                                                                                         |

|        |                  |                                                                              |                            |
|--------|------------------|------------------------------------------------------------------------------|----------------------------|
|        | Micronesia:      | Kiribati<br>Marshall Islands<br>Nauru                                        | 3<br>1<br>1                |
|        | Polynesia:       | American Samoa<br>Cook Islands                                               | 1<br>1                     |
|        |                  | TOTAL: 7                                                                     | 13                         |
| Europe | Eastern Europe:  | Bulgaria<br>Romania<br>Ukraine                                               | 3<br>6<br>1                |
|        | Southern Europe: | Albania<br>Bosnia and Herzegovina<br>Croatia<br>Greece<br>Portugal<br>Serbia | 2<br>6<br>1<br>1<br>1<br>1 |
|        |                  | TOTAL: 9                                                                     | 22                         |
|        |                  | <b>89</b> countries                                                          |                            |

### 1.3 Roles

| Role                               | Number | %  |
|------------------------------------|--------|----|
| Vet                                | 68     | 62 |
| Vet nurse/technician               | 11     | 10 |
| Programme manager (non-veterinary) | 24     | 22 |
| Government worker (non-veterinary) | 2      | 2  |
| Other                              | 5      | 5  |

Other:

- Communications officer for NGO
- Public health advisor
- Shelter volunteer x 2
- Volunteer with NGO

“Programme manager” also included founders and directors of NGOs working in canine sterilisation programmes.

Many respondents had multiple roles e.g. veterinary professional and programme manager, or veterinarian and government worker (e.g. veterinarian and head of rabies control and elimination programme, employee of Ministry of Agriculture, Natural Resources, Livestock and Fisheries and another vet was state coordinator of a prevention of rabies and other zoonoses program, state veterinarian, public health veterinarian or positions within Ministry of Agriculture).

Some of the respondents also worked in some aspect of academia or research, however their responses were included if they also had direct experience of working on sterilisation programmes with FRDs.

## 1.4 Organisations

| Organisation                 | Number | %  |
|------------------------------|--------|----|
| NGO                          | 82     | 75 |
| IGO                          | 3      | 3  |
| Government (national, state) | 20     | 18 |
| Academic/research institute  | 3      | 3  |
| Other                        | 2      | 2  |

Other = independent consultants

## 1.5 Main aims

| Aim                        | Number | %  |
|----------------------------|--------|----|
| Animal Health              | 29     | 26 |
| Human health/Public health | 10     | 9  |
| Public health (veterinary) | 20     | 18 |
| Animal welfare             | 43     | 39 |
| Education/training         | 2      | 2  |
| Community engagement       | 2      | 2  |
| Other                      | 4      | 4  |

Other:

- Cannot pick one – human health, veterinary public health and animal welfare
- Conservation
- Environmental conservation and sustainable development
- Municipal council services

## 1.6 Other aims

| Aim                        | Number | %  |
|----------------------------|--------|----|
| Animal Health              | 92     | 84 |
| Human health/Public health | 46     | 42 |
| Public health (veterinary) | 75     | 68 |
| Animal welfare             | 93     | 85 |
| Education/training         | 78     | 71 |
| Community engagement       | 70     | 64 |
| Other                      | 7      | 6  |

- Wildlife conservation
- Advocacy
- Animal control

## 2. Interim survey

### 2.1 Countries of residence

| Region | Sub-region      | Country of residence | Number | TOTAL |
|--------|-----------------|----------------------|--------|-------|
| Africa | Northern Africa | Morocco              | 1      | 2     |

|          |                                 |                                                                                                                                                                                     |                                                                         |    |
|----------|---------------------------------|-------------------------------------------------------------------------------------------------------------------------------------------------------------------------------------|-------------------------------------------------------------------------|----|
|          |                                 | Tunisia                                                                                                                                                                             | 1                                                                       |    |
|          | Sub-Saharan Africa              | Burundi<br>Madagascar<br>Swaziland<br>Malawi<br>Kenya<br>Zimbabwe<br>South Africa<br>Tanzania<br>Uganda<br>Liberia<br>Ethiopia<br>Guinea-bissau<br>Mozambique<br>Namibia<br>Nigeria | 1<br>1<br>1<br>1<br>1<br>2<br>2<br>1<br>1<br>1<br>1<br>1<br>1<br>1<br>1 | 15 |
| Americas | North America                   | Canada<br>USA                                                                                                                                                                       | 2<br>6                                                                  | 2  |
|          | Latin America and the Caribbean | Belize<br>Panama<br>Costa Rica<br>Ecuador<br>Haiti<br>Chile<br>Mexico<br>Guatemala<br>St Kitts and Nevis                                                                            | 1<br>1<br>2<br>1<br>1<br>1<br>1<br>1<br>1                               | 10 |
| Asia     | Eastern Asia                    | Taiwan                                                                                                                                                                              | 1                                                                       | 1  |
|          | South-Eastern Asia              | Indonesia<br>Malaysia<br>Philippines<br>Thailand                                                                                                                                    | 2<br>2<br>3<br>1                                                        | 4  |
|          | Southern Asia                   | Afghanistan<br>India<br>Pakistan<br>Nepal<br>Bangladesh<br>Sri Lanka                                                                                                                | 2<br>11<br>4<br>6<br>2<br>1                                             | 6  |
|          | Western Asia                    | Oman<br>Kuwait                                                                                                                                                                      | 1<br>1                                                                  | 2  |
| Europe   |                                 | UK<br>Portugal<br>Germany<br>Ukraine<br>Bulgaria<br>Romania<br>Denmark<br>Bosnia<br>Italy                                                                                           | 18<br>1<br>1<br>1<br>1<br>1<br>1<br>1<br>1                              | 9  |
| Oceania  |                                 | Australia<br>Fiji<br>NZ                                                                                                                                                             | 5<br>1<br>1                                                             | 3  |

## 2.2 Countries worked

| Region   | Sub-region                      | Country                     | Number    |
|----------|---------------------------------|-----------------------------|-----------|
| Africa   | Northern Africa                 | Egypt                       | 1         |
|          |                                 | Tunisia                     | 2         |
|          |                                 | Morocco                     | 2         |
|          | Sub-Saharan Africa              | Gambia                      | 1         |
|          |                                 | Madagascar                  | 1         |
|          |                                 | Swaziland                   | 1         |
|          |                                 | Malawi                      | 3         |
|          |                                 | Kenya                       | 3         |
|          |                                 | Zimbabwe                    | 2         |
|          |                                 | South Africa                | 4         |
|          |                                 | Tanzania                    | 3         |
|          |                                 | Burundi                     | 1         |
|          |                                 | Uganda                      | 2         |
|          |                                 | Ghana                       | 2         |
|          |                                 | Ethiopia                    | 2         |
|          |                                 | Liberia                     | 1         |
|          |                                 | Namibia                     | 1         |
|          |                                 | Mozambique                  | 1         |
|          |                                 | Guinea-bissau               | 1         |
|          |                                 | Nigeria                     | 1         |
|          |                                 | Mauritius                   | 1         |
|          |                                 | <b>TOTAL (20 countries)</b> | <b>36</b> |
| Americas | North America                   | USA                         | 2         |
|          |                                 | Canada                      | 4         |
|          | Latin America and the Caribbean | Nicaragua                   | 5         |
|          |                                 | Guatemala                   | 4         |
|          |                                 | Panama                      | 1         |
|          |                                 | Costa Rica                  | 3         |
|          |                                 | Haiti                       | 4         |
|          |                                 | Chile                       | 2         |
|          |                                 | Peru                        | 4         |
|          |                                 | Mexico                      | 4         |
|          |                                 | Dominica                    | 1         |
|          |                                 | Dominican republic          | 4         |
|          |                                 | Colombia                    | 1         |
|          |                                 | Bahamas                     | 1         |
|          |                                 | Brazil                      | 2         |
|          |                                 | Belize                      | 1         |
|          |                                 | Ecuador                     | 4         |
|          |                                 | Guyana                      | 1         |
|          |                                 | <b>TOTAL (17 countries)</b> | <b>48</b> |
| Asia     | Eastern Asia:                   | China                       | 3         |
|          |                                 | ?Taiwan                     | 1         |

|         |                                                                     |                                                                                                            |                                                  |
|---------|---------------------------------------------------------------------|------------------------------------------------------------------------------------------------------------|--------------------------------------------------|
|         | South<br>Eastern Asia                                               | Cambodia<br>Indonesia<br>Laos<br>Malaysia<br>Philippines<br>Thailand<br>Vietnam                            | 4<br>8<br>2<br>2<br>5<br>16<br>2                 |
|         | Southern<br>Asia                                                    | Pakistan<br>Nepal<br>Afghanistan<br>Bangladesh<br>India<br>Iran (Islamic<br>republic of)<br>Sri Lanka      | 4<br>14<br>2<br>3<br>30<br>1<br>9                |
|         | Western Asia                                                        | Iraq<br>UAE<br>Jordan<br>Syria<br>Turkey<br><br>TOTAL ( <b>21</b><br>countries)                            | 1<br>1<br>2<br>1<br>1<br><br>112                 |
| Oceania | Australasia:<br><br>Melanesia:<br><br>Micronesia:<br><br>Polynesia: | Australia<br><br>Fiji<br><br>Kiribati<br><br>Tonga<br>Cook islands<br><br>TOTAL ( <b>5</b><br>countries)   | 3<br><br>1<br><br>1<br><br>1<br>1<br><br>7       |
| Europe  | Eastern<br>Europe                                                   | Ukraine<br>Bulgaria<br>Romania<br>Russia                                                                   | 3<br>2<br>7<br>1                                 |
|         | Southern<br>Europe                                                  | Albania<br>Bosnia<br>Portugal<br>Italy<br>Greece<br>Spain<br>Cyprus<br><br>TOTAL ( <b>11</b><br>countries) | 1<br>7<br>1<br>1<br>4<br>1<br>1<br><br><b>29</b> |

## 2.3 Roles

| Role                 | Number | %  |
|----------------------|--------|----|
| Vet                  | 55     | 51 |
| Vet nurse/technician | 8      | 7  |

|            |    |    |
|------------|----|----|
| PM         | 25 | 23 |
| CAHW/AHT   | 5  | 5  |
| Researcher | 6  | 6  |
| Other      | 8  | 7  |

Other:

- Founder/co-founder NGO x 3
- Volunteer
- Committee member for NGO
- Animal catcher/handler and transportation
- Director
- Assistant manager of NGO

## 2.4 Organisations

| Organisation      | Number | %  |
|-------------------|--------|----|
| NGO               | 76     | 71 |
| IGO               | 1      | 1  |
| Govt              | 16     | 15 |
| Academic/research | 13     | 12 |
| Other             | 1      | 1  |

Other:

- Private vet

## 2.5 Main aims

| Aim                  | Number | %  |
|----------------------|--------|----|
| Animal health        | 23     | 22 |
| Human health         | 3      | 3  |
| VPH                  | 23     | 22 |
| Animal welfare       | 47     | 44 |
| Community engagement | 1      | 1  |
| Education/training   | 5      | 5  |
| Other                | 5      | 5  |

Other:

- All of above but main charter is animal control
- Sustainability, community conservation and development
- One health education (training vets/vet students on OH issues spanning vet med, human health and conservation issues) (education/training)
- Improve public safety (in relation to animals) + wellbeing of the animals
- 2 x wildlife conservation

## 2.6 Other aims

| Aim                  | Number | %    |
|----------------------|--------|------|
| Animal health        | 82     | 76.6 |
| Human health         | 41     | 38.3 |
| VPH                  | 74     | 69.2 |
| Animal welfare       | 88     | 82.2 |
| Community engagement | 74     | 69.2 |

|                    |    |      |
|--------------------|----|------|
| Education/training | 82 | 76.6 |
| Other              | 29 | 27.1 |

Other:

- Majority = wildlife conservation (?22)
- Dog shelter
- Human-animal bond

### 3. Delphi round 1

#### 3.1 Countries of residence

| Region   | Sub-region                      | Country of residence                                                                    | Number                          | TOTAL |
|----------|---------------------------------|-----------------------------------------------------------------------------------------|---------------------------------|-------|
| Africa   | Northern Africa                 | Morocco                                                                                 | 1                               | 1     |
|          | Sub-Saharan Africa              | Burundi<br>Malawi<br>Tanzania<br>Uganda                                                 | 1<br>1<br>1<br>1                | 4     |
| Americas | North America                   | Canada<br>USA                                                                           | 1<br>4                          | 5     |
|          | Latin America and the Caribbean | Panama<br>Costa Rica<br>Chile<br>Mexico<br>Guatemala<br>St Kitts and Nevis<br>Nicaragua | 1<br>1<br>1<br>1<br>1<br>1<br>1 | 7     |
| Asia     | South-Eastern Asia              | Indonesia<br>Thailand                                                                   | 1<br>1                          | 2     |
|          | Southern Asia                   | Afghanistan<br>India<br>Nepal<br>Pakistan                                               | 1<br>7<br>2<br>1                | 11    |
|          | Western Asia                    | Kuwait                                                                                  | 1                               | 1     |
| Europe   |                                 | UK<br>Portugal<br>Bosnia<br>Italy                                                       | 5<br>1<br>1<br>1                | 8     |
| Oceania  |                                 | Australia<br>NZ                                                                         | 4<br>1                          | 5     |

#### 3.2 Countries worked

| Region | Sub-region      | Country            | Number |
|--------|-----------------|--------------------|--------|
| Africa | Northern Africa | Tunisia<br>Morocco | 1<br>2 |
|        |                 | Ethiopia<br>Malawi | 1<br>2 |

|          |                                 |                                                                                                                                                                                                                                                  |                                                                                                  |
|----------|---------------------------------|--------------------------------------------------------------------------------------------------------------------------------------------------------------------------------------------------------------------------------------------------|--------------------------------------------------------------------------------------------------|
|          | Sub-Saharan Africa              | Kenya<br>South Africa<br>Tanzania<br>Burundi<br>Uganda<br>Ghana<br>Mauritius<br><br>TOTAL ( <b>11</b> countries)                                                                                                                                 | 1<br>2<br>3<br>1<br>2<br>1<br>1<br><br>17                                                        |
| Americas | North America                   | Canada                                                                                                                                                                                                                                           | 3                                                                                                |
|          | Latin America and the Caribbean | Nicaragua<br>Guatemala<br>Panama<br>Costa Rica<br>Haiti<br>Chile<br>Peru<br>Mexico<br>Dominica<br>Dominican republic<br>Colombia<br>Bahamas<br>Brazil<br>Belize<br>Ecuador<br>Guyana<br>Paraguay<br>Honduras<br><br>TOTAL ( <b>19</b> countries) | 3<br>2<br>1<br>3<br>3<br>2<br>2<br>2<br>1<br>3<br>2<br>1<br>2<br>1<br>3<br>1<br>2<br>2<br><br>39 |
| Asia     | Eastern Asia:                   | China                                                                                                                                                                                                                                            | 2                                                                                                |
|          | South Eastern Asia              | Cambodia<br>Indonesia<br>Laos<br>Thailand<br>Vietnam                                                                                                                                                                                             | 3<br>3<br>2<br>3<br>1                                                                            |
|          | Southern Asia                   | Pakistan<br>Nepal<br>Afghanistan<br>India<br>Iran (Islamic republic of)<br>Sri Lanka                                                                                                                                                             | 1<br>6<br>1<br>12<br>1<br>4                                                                      |
|          | Western Asia                    | Iraq<br>UAE<br>Jordan<br>Syria<br>Turkey<br><br>TOTAL ( <b>17</b> countries)                                                                                                                                                                     | 1<br>1<br>1<br>1<br>1<br><br>44                                                                  |

|         |                 |                             |    |
|---------|-----------------|-----------------------------|----|
| Oceania | Australasia:    | Australia                   | 3  |
|         | Micronesia:     | Kiribati                    | 1  |
|         | Polynesia:      | Tonga                       | 1  |
|         |                 | TOTAL ( <b>3</b> countries) | 5  |
| Europe  | Eastern Europe  | Ukraine                     | 1  |
|         |                 | Romania                     | 4  |
|         |                 | Russia                      | 1  |
|         | Southern Europe | Albania                     | 1  |
|         |                 | Bosnia                      | 4  |
|         |                 | Portugal                    | 1  |
|         |                 | Italy                       | 1  |
|         |                 | Greece                      | 1  |
|         |                 | Cyprus                      | 1  |
|         |                 | TOTAL ( <b>9</b> countries) | 15 |

### 3.3 Roles

| Role                 | Number | %  |
|----------------------|--------|----|
| Vet                  | 17     | 39 |
| Vet nurse/technician | 5      | 11 |
| PM                   | 14     | 32 |
| CAHW/AHT             | 0      | -  |
| Researcher           | 7      | 16 |
| Other                | 1      | 2  |

### 3.4 Organisations

| Organisation      | Number | %  |
|-------------------|--------|----|
| NGO               | 35     | 80 |
| IGO               | -      | -  |
| Govt              | 2      | 5  |
| Academic/research | 6      | 14 |
| Other             | 1      | 2  |

### 3.5 Main aims

| Aim                  | Number | %  |
|----------------------|--------|----|
| Animal health        | 9      | 21 |
| Human health         | 1      | 2  |
| VPH                  | 8      | 18 |
| Animal welfare       | 22     | 50 |
| Community engagement | -      | -  |
| Education/training   | 2      | 5  |
| Other                | 2      | 5  |

### 3.6 All aims

| <b>Aim</b>           | <b>Number</b> | <b>%</b> |
|----------------------|---------------|----------|
| Animal health        | 30            | 6        |
| Human health         | 16            | 36       |
| VPH                  | 29            | 66       |
| Animal welfare       | 36            | 82       |
| Community engagement | 31            | 71       |
| Education/training   | 34            | 77       |
| Other                | 10            | 23       |

### 3.7 Rabies endemic

| <b>Yes</b> | <b>No</b> |
|------------|-----------|
| 37 (84.1%) | 7 (15.9%) |

## 4. Delphi round 2

### 4.1 Countries of residence

| <b>Region</b> | <b>Sub-region</b>               | <b>Country of residence</b> | <b>Number</b> | <b>TOTAL</b> |
|---------------|---------------------------------|-----------------------------|---------------|--------------|
| Africa        | Sub-Saharan Africa              | Burundi                     | 1             | 2            |
|               |                                 | Tanzania                    | 1             |              |
| Americas      | North America                   | Canada                      | 1             | 4            |
|               |                                 | USA                         | 3             |              |
|               | Latin America and the Caribbean | Panama                      | 1             | 6            |
|               |                                 | Costa Rica                  | 1             |              |
|               |                                 | Chile                       | 1             |              |
|               |                                 | Mexico                      | 1             |              |
|               |                                 | Guatemala                   | 1             |              |
|               |                                 | St Kitts and Nevis          | 1             |              |
| Asia          | South-Eastern Asia              | Indonesia                   | 1             | 2            |
|               |                                 | Thailand                    | 1             |              |
|               | Southern Asia                   | Afghanistan                 | 1             | 10           |
|               |                                 | India                       | 6             |              |
|               |                                 | Nepal                       | 2             |              |
|               |                                 | Pakistan                    | 1             |              |
|               | Western Asia                    | Kuwait                      | 1             | 1            |
| Europe        |                                 | UK                          | 5             | 8            |
|               |                                 | Portugal                    | 1             |              |
|               |                                 | Bosnia                      | 1             |              |
|               |                                 | Italy                       | 1             |              |
| Oceania       |                                 | Australia                   | 3             | 3            |

## 4.2 Countries worked

| Region   | Sub-region                      | Country                      | Number |
|----------|---------------------------------|------------------------------|--------|
| Africa   | Northern Africa                 | Tunisia                      | 1      |
|          |                                 | Morocco                      | 1      |
|          | Sub-Saharan Africa              | Ethiopia                     | 1      |
|          |                                 | Malawi                       | 1      |
|          |                                 | Kenya                        | 1      |
|          |                                 | South Africa                 | 2      |
|          |                                 | Tanzania                     | 3      |
|          |                                 | Burundi                      | 1      |
|          |                                 | Mauritius                    | 1      |
|          |                                 | TOTAL ( <b>11</b> countries) | 12     |
| Americas | North America                   | Canada                       | 3      |
|          | Latin America and the Caribbean | Nicaragua                    | 2      |
|          |                                 | Guatemala                    | 2      |
|          |                                 | Panama                       | 1      |
|          |                                 | Costa Rica                   | 3      |
|          |                                 | Haiti                        | 3      |
|          |                                 | Chile                        | 2      |
|          |                                 | Peru                         | 2      |
|          |                                 | Mexico                       | 2      |
|          |                                 | Dominica                     | 1      |
|          |                                 | Dominican republic           | 3      |
|          |                                 | Colombia                     | 2      |
|          |                                 | Bahamas                      | 1      |
|          |                                 | Brazil                       | 2      |
|          |                                 | Belize                       | 1      |
|          |                                 | Ecuador                      | 3      |
|          |                                 | Guyana                       | 1      |
|          |                                 | Paraguay                     | 2      |
|          |                                 | Honduras                     | 2      |
|          |                                 | TOTAL ( <b>19</b> countries) | 39     |
| Asia     | Eastern Asia:                   | China                        | 1      |
|          | South Eastern Asia              | Cambodia                     | 3      |
|          |                                 | Indonesia                    | 3      |
|          |                                 | Laos                         | 2      |
|          |                                 | Thailand                     | 3      |
|          |                                 | Vietnam                      | 1      |
|          | Southern Asia                   | Pakistan                     | 1      |
|          |                                 | Nepal                        | 6      |
|          |                                 | Afghanistan                  | 1      |
|          |                                 | India                        | 10     |
|          |                                 | Iran (Islamic republic of)   | 1      |
|          |                                 | Sri Lanka                    | 4      |
|          | Western Asia                    | Iraq                         | 1      |

|         |                                 |                                                                                                  |                                      |
|---------|---------------------------------|--------------------------------------------------------------------------------------------------|--------------------------------------|
|         |                                 | UAE<br>Jordan<br>Syria<br>Turkey<br><br>TOTAL ( <b>17</b><br>countries)                          | 1<br>1<br>1<br>1<br><br>42           |
| Oceania | Australasia:<br><br>Micronesia: | Australia<br><br>Kiribati<br><br>TOTAL ( <b>2</b><br>countries)                                  | 2<br><br>1<br><br>3                  |
| Europe  | Eastern<br>Europe               | Ukraine<br>Romania                                                                               | 1<br>4                               |
|         | Southern<br>Europe              | Albania<br>Bosnia<br>Portugal<br>Italy<br>Greece<br>Cyprus<br><br>TOTAL ( <b>9</b><br>countries) | 1<br>4<br>1<br>1<br>1<br>1<br><br>15 |

#### 4.3 Roles

| Role                 | Number | %  |
|----------------------|--------|----|
| Vet                  | 13     | 36 |
| Vet nurse/technician | 4      | 11 |
| PM                   | 12     | 33 |
| CAHW/AHT             | 0      | -  |
| Researcher           | 6      | 17 |
| Other                | 1      | 3  |

#### 4.4 Organisations

| Organisation      | Number | %  |
|-------------------|--------|----|
| NGO               | 28     | 78 |
| IGO               | -      | -  |
| Govt              | 2      | 6  |
| Academic/research | 5      | 14 |
| Other             | 1      | 3  |

#### 4.5 Main aims

| Aim           | Number | %  |
|---------------|--------|----|
| Animal health | 7      | 19 |
| Human health  | 1      | 3  |

|                      |    |    |
|----------------------|----|----|
| VPH                  | 6  | 17 |
| Animal welfare       | 18 | 50 |
| Community engagement | -  | -  |
| Education/training   | 2  | 6  |
| Other                | 2  | 6  |

#### 4.6 Rabies endemic

| <b>Yes</b> | <b>No</b> |
|------------|-----------|
| 31 (86%)   | 5 (14%)   |
