# Supplementary material for: Priorities for Research into the Impact of Canine Surgical Sterilisation Programmes for Free-Roaming Dogs: An International Priority Setting Partnership
Source: Animals (Basel). 2021 Jul 30;11(8):2250. doi: 10.3390/ani11082250 (PMC8388514; doi:10.3390/ani11082250)
Supplement: Supplementary file 1 [file animals-11-02250-s001.zip › File S5 Questions for final prioritisation.pdf]

## Impact of Canine Surgical Sterilisation Programmes Priority Setting Partnership

File S5 Short list of CIRQs for final prioritisation.

### INDIVIDUAL RANKING OF QUESTIONS/ UNCERTAINTIES

Please spend some time reviewing these uncertainties about the impact of canine surgical sterilisation programmes. In the online survey you will be asked to rank them from 1–26, **1 being the most important**, and **26 being the least important**, in your opinion, for future research to address. You may find this easier to complete on this document prior to completing the online survey. Make a note of any comments you may have in the far right hand column.

| ID | Uncertainty                                                                                                                                                                                                   | Your ranking (1-26) | Notes |
|----|---------------------------------------------------------------------------------------------------------------------------------------------------------------------------------------------------------------|---------------------|-------|
| A  | In order to affect the size of a dog population, what proportion of the population needs to be sterilised and over what time period?                                                                          |                     |       |
| B  | How does dog population turnover change in response to a sterilisation programme?                                                                                                                             |                     |       |
| C  | What effect does targeting of female dogs only have on the impact of sterilisation programmes?                                                                                                                |                     |       |
| D  | Does sterilisation affect the rate of dog-bites in people?                                                                                                                                                    |                     |       |
| E  | Do sterilisation programmes affect community behaviour (human-dog interactions) towards free-roaming dogs?                                                                                                    |                     |       |
| F  | Do sterilisation programmes affect community perception of free-roaming dogs?                                                                                                                                 |                     |       |
| G  | Do areas with sterilisation and vaccination programmes have a lower incidence of rabies in dogs and humans than areas with vaccination only programmes (that achieve the same level of vaccination coverage)? |                     |       |
| H  | Does age at sterilisation have any effect on subsequent changes in population size, behaviour, longevity and health?                                                                                          |                     |       |
| I  | Are sterilisation programmes cost-effective taking into account all programme objectives?                                                                                                                     |                     |       |
| J  | What factors regulate dog population size, both natural and human mediated?                                                                                                                                   |                     |       |
| K  | What are the effects of one-off or intermittent sterilisation (with or without vaccination) programmes in comparison to consistent programmes in an area? What frequency is optimal?                          |                     |       |

## Impact of Canine Surgical Sterilisation Programmes Priority Setting Partnership

|   |                                                                                                                                                                             |  |  |
|---|-----------------------------------------------------------------------------------------------------------------------------------------------------------------------------|--|--|
| L | How common is training of local veterinary personnel a component of sterilisation programmes. When implemented, is there a measurable improvement in local veterinary care? |  |  |
| M | How do sterilisation programmes (of different sizes and durations) affect the size of dog populations?                                                                      |  |  |
| N | Is sterilisation associated with a change in expected lifespan?                                                                                                             |  |  |
| O | How do sterilisation programmes affect birth rates in the population?                                                                                                       |  |  |
| P | Does sterilisation have any direct effects on rabies transmission e.g. in terms of behavioural changes?                                                                     |  |  |
| Q | Are changes in policy e.g. ending of culling or government funding for dog population management, one impact that may be seen after a sterilisation programme?              |  |  |
| R | What are any negative effects on free-roaming dogs as a result of sterilisation programmes e.g. surgical complications, welfare implications?                               |  |  |
| S | What logistical factors affect community engagement/participation in sterilisation programmes?                                                                              |  |  |
| T | What are the most common causes of death for free-roaming dogs and are they different in sterilised dogs?                                                                   |  |  |
| U | Does sterilisation affect free-roaming dog interactions with humans?                                                                                                        |  |  |
| V | Does sterilisation affect the incidence of dog-to-dog aggression?                                                                                                           |  |  |
| W | Does sterilisation affect rates/risk of specific health conditions (e.g. skin conditions, road traffic accidents)                                                           |  |  |
| X | Are sterilisation programmes cost-effective if rabies control is the only objective?                                                                                        |  |  |
| Y | Is sterilisation associated with a change in body condition score?                                                                                                          |  |  |
| Z | Do sterilisation programmes result in more free-roaming dogs being adopted or classed as being 'owned' in an area?                                                          |  |  |
