# Supplementary material for: Priorities for Research into the Impact of Canine Surgical Sterilisation Programmes for Free-Roaming Dogs: An International Priority Setting Partnership
Source: Animals (Basel). 2021 Jul 30;11(8):2250. doi: 10.3390/ani11082250 (PMC8388514; doi:10.3390/ani11082250)
Supplement: Supplementary file 1 [file animals-11-02250-s001.zip › Table S1 Reprise Reporting Guidelines.pdf]

**Table S1 REPRISE Reporting Guidelines**

| No                                                            | Item                                                                                      | Descriptor and/or <i>examples</i>                                                                                                                                                  |
|---------------------------------------------------------------|-------------------------------------------------------------------------------------------|------------------------------------------------------------------------------------------------------------------------------------------------------------------------------------|
| <b>A Context and scope</b>                                    |                                                                                           |                                                                                                                                                                                    |
| 1                                                             | Define geographical scope                                                                 | Global                                                                                                                                                                             |
| 2                                                             | Define health area, field, focus                                                          | Canine surgical sterilisation programmes for free-roaming dogs, identifying research priorities                                                                                    |
| 3                                                             | Define end-users of research                                                              | People working on or involved in any programme involving canine surgical sterilisation for free-roaming dogs                                                                       |
| 4                                                             | Define the target audience of the priorities                                              | Policymakers, funders, researchers                                                                                                                                                 |
| 5                                                             | Identify the broad research area                                                          | One health, Public health, Veterinary research, DPM research, Animal welfare research                                                                                              |
| 6                                                             | Identify the type of research question                                                    | Intervention, evaluation, implementation                                                                                                                                           |
| 7                                                             | Define the time frame                                                                     | Medium and long-term priorities                                                                                                                                                    |
| <b>B Governance and team</b>                                  |                                                                                           |                                                                                                                                                                                    |
| 8                                                             | Describe selection of the leadership and management team                                  | Materials and methods, lines 102-107                                                                                                                                               |
| 9                                                             | Describe the characteristics of the team, and the networks they represent                 | Materials and methods, lines 102-107                                                                                                                                               |
| 10                                                            | Describe any training or experience in priority setting                                   | Materials and methods, lines 107-108<br>The first author also attended a JLA PSP final priority setting workshop as an observer in June 2018                                       |
| <b>C Framework for priority setting</b>                       |                                                                                           |                                                                                                                                                                                    |
| 11                                                            | State the framework used (if any)                                                         | James Lind Alliance                                                                                                                                                                |
| <b>D Stakeholders or participants</b>                         |                                                                                           |                                                                                                                                                                                    |
| 12                                                            | Define the inclusion criteria for stakeholders involved in priority-setting               | non-governmental organisations, government, research institutes with experience of field work with free-roaming dogs and sterilisation programmes, policymakers                    |
| 13                                                            | State the strategy or method for identifying and engaging stakeholders                    | Recruitment by email through existing professional and personal networks of steering group, Dogs Trust Worldwide and Global Alliance for Rabies Control; Snowballing; Social media |
| 14                                                            | Indicate the number of participants and/or organisations involved                         | Results,                                                                                                                                                                           |
| 15                                                            | Describe the characteristics of stakeholders                                              | Stakeholder group, demographic characteristics, areas of interest and expertise, discipline, affiliations                                                                          |
| 16                                                            | State if reimbursement for participation was provided                                     | No reimbursement or financial incentive for participation                                                                                                                          |
| <b>E Identification and collection of research priorities</b> |                                                                                           |                                                                                                                                                                                    |
| 17                                                            | Describe methods for collecting priorities from stakeholders                              | Online questionnaire                                                                                                                                                               |
| 18                                                            | Describe methods for collating and categorizing priorities                                | Thematic analysis                                                                                                                                                                  |
| 19                                                            | Describe methods and reasons for removing priorities                                      | Based on scope and clarity                                                                                                                                                         |
| 20                                                            | Describe methods for refining or translating priorities into research topics or questions | Reviewed by authors and verified by steering group                                                                                                                                 |
| 21                                                            | Describe methods for checking whether research questions or topics have been answered     | Evidence search for systematic reviews or published guidelines                                                                                                                     |
| 22                                                            | Describe number of research questions or topics                                           | Results, Figure 2                                                                                                                                                                  |
| <b>F Prioritisation of research topics/questions</b>          |                                                                                           |                                                                                                                                                                                    |
| 23                                                            | Describe methods and criteria for prioritising research topics or questions               | Online interim prioritisation survey and Delphi survey                                                                                                                             |

|          |                                                                                                                                       |                                                                                                                                                      |
|----------|---------------------------------------------------------------------------------------------------------------------------------------|------------------------------------------------------------------------------------------------------------------------------------------------------|
| 24       | Provide reasons for excluding research topics/questions                                                                               | Lowest ranking scores and proportion of participants who agreed that it was a top 10 priority                                                        |
| <b>G</b> | <b>Output</b>                                                                                                                         |                                                                                                                                                      |
| 25       | Specificity of research priorities are clear                                                                                          | Results, Table 3                                                                                                                                     |
| <b>H</b> | <b>Evaluation and feedback</b>                                                                                                        |                                                                                                                                                      |
| 26       | Describe how the process of prioritization was evaluated                                                                              | Free- text box for comments                                                                                                                          |
| 27       | Describe the approach for feeding back priorities to stakeholders and/or to the public; and how feedback was addressed and integrated | Lay summary of results sent to all participants, presentation of results at various conferences, paper to be submitted for peer-reviewed publication |
| <b>I</b> | <b>Implementation</b>                                                                                                                 |                                                                                                                                                      |
| 28       | Outline the strategy or action plans for implementing priorities                                                                      | To be completed                                                                                                                                      |
| 29       | Describe evaluation of impact                                                                                                         | To be completed                                                                                                                                      |
| <b>J</b> | <b>Funding and conflict of interest</b>                                                                                               |                                                                                                                                                      |
| 30       | State sources of funding                                                                                                              | Dogs Trust Canine Welfare Grant and University of Nottingham School of Veterinary Medicine and Science                                               |
| 31       | Outline the budget and/or cost                                                                                                        | n/a – part of PhD project                                                                                                                            |
| 32       | Provide declaration of conflict of interest                                                                                           | No conflict of interest                                                                                                                              |
