# Supplementary material for: Priorities for Research into the Impact of Canine Surgical Sterilisation Programmes for Free-Roaming Dogs: An International Priority Setting Partnership
Source: Animals (Basel). 2021 Jul 30;11(8):2250. doi: 10.3390/ani11082250 (PMC8388514; doi:10.3390/ani11082250)
Supplement: Supplementary file 1 [file animals-11-02250-s001.zip › Table S2 Evidence search.pdf]

Table S2 Details of search terms used and databases searched in evidence search

|                          |                                                                                                                                                                                                                                                                                                                    |                                      |
|--------------------------|--------------------------------------------------------------------------------------------------------------------------------------------------------------------------------------------------------------------------------------------------------------------------------------------------------------------|--------------------------------------|
| Databases searched:      | CAB Abstracts (1910-present)<br><br>Medline In-Process and Non-Indexed Citations and Ovid Medline (1946-present)                                                                                                                                                                                                   | Via University of Nottingham library |
| Search terms:            | dog.mp. OR dogs.mp. OR canine.mp. OR canines.mp. OR canis.mp. OR exp Dogs/ AND sterilis\$.mp. OR steriliz\$.mp. OR dog population management.mp. OR animal birth control.mp. OR neuter\$.mp. OR spay\$.mp. OR spey\$.mp. OR castrat\$.mp. OR ovariectomy.mp. OR fertility control.mp. OR gonadectomy.mp. OR ABC.mp |                                      |
| Date searches performed: | 06/09/2019                                                                                                                                                                                                                                                                                                         |                                      |
