# Supplementary material for: Priorities for Research into the Impact of Canine Surgical Sterilisation Programmes for Free-Roaming Dogs: An International Priority Setting Partnership
Source: Animals (Basel). 2021 Jul 30;11(8):2250. doi: 10.3390/ani11082250 (PMC8388514; doi:10.3390/ani11082250)
Supplement: Supplementary file 1 [file animals-11-02250-s001.zip › Table S3 Questions for interim prioritisation.pdf]

Table S3 Long list of CIRQs for interim prioritisation and number of submitted questions contributing to each CIRQ

| Theme                     |    | Question                                                                                                                       | No. submitted Qs contributing to Q |
|---------------------------|----|--------------------------------------------------------------------------------------------------------------------------------|------------------------------------|
| <b>Dog Behaviour</b>      |    |                                                                                                                                |                                    |
|                           | 1  | Does sterilisation affect free-roaming dog interactions with humans?                                                           | 14                                 |
|                           | 2  | Does sterilisation affect the rate of dog-bites in people?                                                                     | 22                                 |
|                           | 3  | Does sterilisation reduce the incidence of dog-to-dog aggression?                                                              | 8                                  |
|                           | 4  | Does sterilisation affect the roaming behaviour of dogs, in terms of distance/area?                                            | 9                                  |
|                           | 5  | Does sterilisation change contact rates between free-roaming dogs?                                                             | 1                                  |
|                           | 6  | Are there any behavioural changes in unsterilised males where programmes focus on sterilisation of females?                    | 2                                  |
|                           | 7  | What is the social structure of free-roaming dog populations and how does surgical sterilisation affect this social structure? | 11                                 |
| <b>Health and welfare</b> |    |                                                                                                                                |                                    |
|                           | 8  | Is sterilisation associated with a change in expected lifespan?                                                                | 31                                 |
|                           | 9  | What are the most common causes of death for free-roaming dogs and are they different in sterilised dogs?                      | 2                                  |
|                           | 10 | Does sterilisation affect rates/risk of specific health conditions (e.g. skin conditions, road traffic accidents)              | 12                                 |
|                           | 11 | What is the impact of sterilisation programmes on incidence of TVT?                                                            | 4                                  |
|                           | 12 | Is sterilisation associated with a change in body condition score?                                                             | 3                                  |
|                           | 13 | Are any changes in welfare seen in the whole free-roaming dog population, or only in sterilised dogs?                          | 10                                 |

|                                      |    |                                                                                                                                                                                                                                |    |
|--------------------------------------|----|--------------------------------------------------------------------------------------------------------------------------------------------------------------------------------------------------------------------------------|----|
| <b>Human behaviour change</b>        |    |                                                                                                                                                                                                                                |    |
|                                      | 14 | What sociocultural or religious barriers may affect participation in sterilisation programmes in different settings?                                                                                                           | 8  |
|                                      | 15 | What logistical factors affect community engagement/participation in sterilisation programmes?                                                                                                                                 | 15 |
|                                      | 16 | Do sterilisation programmes affect community perception of free-roaming dogs?                                                                                                                                                  | 17 |
|                                      | 17 | Do sterilisation programmes affect community behaviour (human-dog interactions) towards free-roaming dogs?                                                                                                                     | 12 |
|                                      | 18 | Do sterilisation programmes result in more free-roaming dogs being adopted or classed as being 'owned' in an area?                                                                                                             | 8  |
| <b>Population size and structure</b> |    |                                                                                                                                                                                                                                |    |
|                                      | 19 | What factors regulate dog population size, both natural and human mediated?                                                                                                                                                    | 15 |
|                                      | 20 | How do sterilisation programmes (of different sizes and durations) affect the size of dog populations?                                                                                                                         | 23 |
|                                      | 21 | In order to affect the size of a dog population, what proportion of the population needs to be sterilised and over what time period?                                                                                           | 42 |
|                                      | 22 | How can we establish what the dog population turnover is (in terms of birth rates, age and sex specific death rates and in-out migration rates) and therefore monitor how it changes in response to a sterilisation programme? | 8  |
|                                      | 23 | Do sterilisation programmes affect birth rates in the population?                                                                                                                                                              | 9  |
|                                      | 24 | Do sterilisation programmes affect age and sex specific death rates in the population?                                                                                                                                         | 4  |
|                                      | 25 | Do sterilisation programmes affect migration rates in a population?                                                                                                                                                            | 6  |
|                                      | 26 | Do sterilisation programmes affect the age structure of the dog population?                                                                                                                                                    | 3  |
| <b>Logistics</b>                     |    |                                                                                                                                                                                                                                |    |

|                                 |    |                                                                                                                                                                             |    |
|---------------------------------|----|-----------------------------------------------------------------------------------------------------------------------------------------------------------------------------|----|
|                                 | 27 | Does age at sterilisation have any effect on subsequent changes in population size, behaviour, longevity and health?                                                        | 7  |
|                                 | 28 | What effect does targeting of female dogs only have on the impact of sterilisation programmes?                                                                              | 18 |
|                                 | 29 | What are the effects of one-off or intermittent sterilisation (with or without rabies vaccination) programmes? What frequency is optimal?                                   | 9  |
|                                 | 30 | Do inaccessible dogs have an effect on the impact of the programme?                                                                                                         | 4  |
|                                 | 31 | How common is training of local veterinary personnel a component of sterilisation programmes. When implemented, is there a measurable improvement in local veterinary care? | 4  |
|                                 | 32 | Are there any differences in impact between sterilisation programmes conducted in urban and rural areas?                                                                    | 2  |
| <b>Policy and economics</b>     |    |                                                                                                                                                                             |    |
|                                 | 33 | Do the outcomes of sterilisation programmes match stakeholder expectations?                                                                                                 | 1  |
|                                 | 34 | Are changes in policy e.g. ending of culling or government funding for dog population management, one impact that may be seen after a sterilisation programme?              | 4  |
|                                 | 35 | Are sterilisation programmes cost-effective taking into account all programme objectives?                                                                                   | 9  |
|                                 | 36 | Are sterilisation programmes cost-effective if rabies control is the only objective?                                                                                        | 13 |
| <b>Other animal populations</b> |    |                                                                                                                                                                             |    |
|                                 | 37 | Do canine sterilisation programmes have an impact on other domestic animal populations? e.g. incidence of attacks on livestock, free-roaming cat populations                | 2  |
|                                 | 38 | Do canine sterilisation programmes have an impact on wildlife populations?                                                                                                  | 2  |
| <b>Negative impacts</b>         |    |                                                                                                                                                                             |    |
|                                 | 39 | What are any negative effects on free-roaming dogs as a result of sterilisation programmes e.g. surgical complications, welfare implications?                               | 17 |
| <b>Rabies control</b>           |    |                                                                                                                                                                             |    |

|  |    |                                                                                                                                                                                                               |    |
|--|----|---------------------------------------------------------------------------------------------------------------------------------------------------------------------------------------------------------------|----|
|  |    |                                                                                                                                                                                                               |    |
|  | 40 | Is sterilisation or rabies vaccination more of an incentive for community participation in programmes?                                                                                                        | 5  |
|  | 41 | Does sterilisation affect the rate of rabies vaccination coverage decline? (If so, what is optimal in terms of sterilisation and vaccination coverage and time between campaigns?)                            | 11 |
|  | 42 | How often should sterilised dogs be re-vaccinated against rabies?                                                                                                                                             | 36 |
|  | 43 | Do areas with sterilisation and vaccination programmes have a lower incidence of rabies in dogs and humans than areas with vaccination only programmes (that achieve the same level of vaccination coverage)? | 14 |
|  | 44 | In combined programmes, to what extent are changes in perception and attitudes/behaviour towards free-roaming dogs due to the sterilisation or vaccination component?                                         | 5  |
|  | 45 | Does sterilisation have any direct effects on rabies transmission e.g. in terms of behavioural changes?                                                                                                       | 3  |
|  | 46 | Are owners/carers of free-roaming dogs more likely to bring sterilised dogs to be vaccinated against rabies than unsterilised dogs?                                                                           | 11 |
|  | 47 | Does performing the sterilisation surgery at the same time as the vaccination have any effects on immunity?                                                                                                   | 10 |
